# Supplementary material for: Genotyping and lipid profiling of 601 cultivated sunflower lines reveals novel genetic determinants of oil fatty acid content
Source: BMC Genomics. 2021 Jul 5;22:505. doi: 10.1186/s12864-021-07768-y (PMC8256595; doi:10.1186/s12864-021-07768-y)
Supplement: Supplementary file 15 — Additional file 15: TableS2. ANOVA p-values for FA content in replication experiment. [file 12864_2021_7768_MOESM15_ESM.xlsx]

## Sheet: fa
	line	year	line:year
FA_16:1	6.04995e-09	0.000514904	0.0225567
FA_16:0	1.33327e-27	8.19564e-06	2.11627e-08
FA_17:1	2.59682e-08	0.618155	0.0117878
FA_18:3	5.31592e-18	0.616854	0.00152648
FA_18:2	1.27653e-42	0.066248	6.39131e-06
FA_18:1	9.10056e-43	0.0296294	1.33097e-05
FA_18:0	8.11378e-08	0.12785	0.0170133
FA_19:1	9.53246e-16	0.812654	0.00186471
FA_20:1	5.88246e-25	0.0425943	0.00114423
FA_20:0	6.8137e-05	0.0868861	0.00843709
FA_21:0	0.0473313	0.106108	0.499518
FA_22:0	0.00197577	0.32853	0.342691
FA_23:0	0.00024161	0.0129921	0.0574572
FA_24:1	1.01789e-11	0.0294349	0.00970599
FA_24:0	0.00178066	0.366994	0.160552

## Sheet: tag25
	line	year	line:year
TAG_50:1	8.05072e-16	0.000311665	1.00998e-06
TAG_50:2	6.69222e-25	0.000170659	5.77471e-08
TAG_50:3	3.20983e-30	8.41683e-05	2.22038e-05
TAG_50:4	2.87669e-28	0.0315454	0.0755436
TAG_50:0	4.23261e-33	0.381703	4.63817e-07
TAG_51:1	4.01929e-16	0.245705	0.000613648
TAG_51:2	2.16007e-17	0.0158421	0.0052899
TAG_51:3	5.07262e-25	2.40683e-06	0.000519278
TAG_51:4	1.43359e-39	0.0014677	0.00588959
TAG_52:1	1.98899e-08	0.885205	0.00941802
TAG_52:2	1.1808e-40	0.0364949	1.61158e-09
TAG_52:3	9.97702e-39	0.000137104	6.54157e-08
TAG_52:4	9.81605e-42	0.00763565	0.000325653
TAG_52:5	2.07112e-25	0.0316262	0.00286761
TAG_53:2	2.1051e-18	0.0114597	0.0062792
TAG_53:3	1.23434e-14	0.735882	0.00117764
TAG_53:4	1.44389e-32	0.0263452	0.00483854
TAG_53:5	2.16567e-24	0.0727027	0.0150396
TAG_54:1	0.000673685	0.765934	0.0556897
TAG_54:2	8.15161e-20	0.261356	0.010622
TAG_54:3	5.01304e-38	0.000618826	1.43353e-07
TAG_54:4	9.04461e-29	3.64193e-05	1.7613e-08
TAG_54:5	7.62726e-30	0.184061	2.65457e-05
TAG_54:6	7.73849e-38	0.173672	8.48121e-06
TAG_54:7	6.24767e-28	0.0525502	0.00244781
TAG_55:3	1.2093e-21	0.0632767	0.000244885
TAG_55:4	7.1046e-20	0.0289639	0.00436672
TAG_55:5	1.43452e-28	0.373012	0.00360323
TAG_56:1	3.03117e-05	0.325417	0.686234
TAG_56:2	4.28242e-09	0.890328	0.484695
TAG_56:3	5.00268e-24	0.0193703	0.00345563
TAG_56:4	3.77151e-39	0.00643265	0.0115402
TAG_56:5	1.48541e-26	0.454232	1.11513e-05
TAG_56:6	5.59729e-18	0.487918	0.0130541
TAG_58:2	1.04403e-08	0.0881853	0.511573
TAG_58:3	7.42511e-17	0.0279636	0.230569
TAG_58:4	1.24374e-33	0.0359357	0.220313
TAG_59:2	1.48713e-14	0.0764753	0.173341
TAG_60:2	0.000231323	0.438548	0.250274
TAG_60:3	0.10278	0.1013	0.185267
TAG_48:1	4.53961e-16	0.0125297	1.31562e-08
TAG_48:2	1.10432e-13	0.00269026	1.08141e-08
TAG_49:1	1.37276e-08	0.632649	0.058052

## Sheet: tag3
	line	year	line:year
TAG_50:1	8.40802e-19	0.000215561	4.72492e-08
TAG_50:2	2.52183e-33	0.00320617	0.00298817
TAG_50:3	2.08072e-32	4.54633e-05	7.66555e-06
TAG_50:4	2.22166e-25	0.0959614	0.165109
TAG_50:5	1.02724e-23	0.0380518	0.0315062
TAG_50:6	1.84544e-17	0.00869859	0.0598048
TAG_50:0	0.000496561	0.00356943	3.57333e-05
TAG_51:1	1.85087e-10	0.244829	2.41045e-07
TAG_51:2	1.26318e-09	0.173931	0.00681222
TAG_51:3	2.13398e-23	1.47778e-05	0.0118783
TAG_51:4	4.91727e-37	0.0213957	0.0338336
TAG_51:5	7.53614e-37	0.0358109	0.046628
TAG_52:1	7.03154e-12	0.348576	3.45318e-05
TAG_52:2	5.12242e-20	0.661162	0.00421014
TAG_52:3	0.000505423	0.150407	0.170343
TAG_52:4	2.18599e-30	0.108563	0.00251853
TAG_52:5	1.35527e-29	0.00558487	5.54265e-05
TAG_52:6	6.45593e-22	0.0688873	0.00554923
TAG_53:2	3.79428e-17	0.0861433	0.00134692
TAG_53:3	1.456e-09	0.93337	0.0311495
TAG_53:4	7.08747e-30	0.0295089	0.000782408
TAG_53:5	8.30812e-21	0.127424	0.012135
TAG_54:1	0.000802597	0.383083	0.0011558
TAG_54:2	1.36587e-24	0.655035	0.0319864
TAG_54:3	6.31083e-30	0.00605369	0.00537904
TAG_54:4	7.69956e-06	0.542438	0.539096
TAG_54:5	3.80578e-23	0.38222	0.00024373
TAG_54:6	2.6013e-32	0.323992	0.000484179
TAG_54:7	4.02709e-26	0.0268589	9.61738e-06
TAG_55:3	3.25804e-17	0.34487	0.00666976
TAG_55:4	2.23212e-28	0.00232267	7.07945e-05
TAG_55:5	2.1777e-28	0.239709	3.15029e-05
TAG_56:1	3.3027e-06	0.871693	0.0198168
TAG_56:2	2.09759e-09	0.751115	0.0827619
TAG_56:3	1.93979e-09	0.818501	0.00923338
TAG_56:4	4.43142e-36	0.0643895	0.0205489
TAG_56:5	2.20985e-23	0.052431	1.07331e-06
TAG_56:6	5.03807e-06	0.145618	0.125046
TAG_58:2	5.00406e-16	0.0260164	0.0136542
TAG_58:3	6.19936e-29	0.000845687	0.00111352
TAG_58:4	1.59773e-37	0.145366	0.00916936
TAG_59:2	1.61151e-16	0.000512918	0.133461
TAG_42:1	0.126788	0.114849	0.00936655
TAG_42:2	2.98482e-07	0.000544216	0.0560271
TAG_60:2	2.80802e-07	0.242463	0.744573
TAG_60:3	2.20568e-12	0.137774	0.0247426
TAG_43:1	1.6511e-17	2.5849e-05	5.61403e-07
TAG_44:2	0.00210023	0.125248	0.513025
TAG_45:2	0.0256955	0.389019	0.474039
TAG_46:1	0.000787296	0.527775	0.121074
TAG_46:2	0.00721504	0.303529	0.0667296
TAG_46:3	8.76373e-11	0.218231	0.00336192
TAG_47:2	0.103934	0.452594	0.341957
TAG_48:1	2.17546e-15	0.000691228	1.4558e-10
TAG_48:2	1.30261e-13	0.0415168	7.9433e-05
TAG_48:3	1.42825e-34	0.00124494	0.00017094
TAG_48:4	5.00182e-40	0.0548475	0.066761
TAG_49:1	0.000220567	0.0239007	0.000430344
TAG_49:3	7.26729e-26	0.000439874	5.47944e-07
