# Supplementary material for: Genotyping and lipid profiling of 601 cultivated sunflower lines reveals novel genetic determinants of oil fatty acid content
Source: BMC Genomics. 2021 Jul 5;22:505. doi: 10.1186/s12864-021-07768-y (PMC8256595; doi:10.1186/s12864-021-07768-y)
Supplement: Supplementary file 20 — Additional file 20: TableS7. Functional annotation of genes from LD blocks harboring SNPs with significant association with at least one lipid trait. [file 12864_2021_7768_MOESM20_ESM.xlsx]

## Sheet: Лист1
Trait	Chromosome	Gene ID	Function
FA18:0	14	HanXRQChr14g0439881	Putative serine/threonine/dual specificity protein kinase, catalytic domain; Tyrosine-protein kinase, receptor ROR
FA18:1	6	HanXRQChr06g0180681	Probable 30S ribosomal protein S11, chloroplastic
FA18:1	9	HanXRQChr09g0261691	Uncharacterized protein, supported by expression data
FA18:1	9	HanXRQChr09g0261651	Uncharacterized protein, supported by expression data
FA18:1	9	HanXRQChr09g0261661	Putative tetratricopeptide-like helical domain
FA18:1	9	HanXRQChr09g0261671	Probable quinone reductase family protein
FA18:1	9	HanXRQChr09g0261681	Putative calcium/proton exchanger
FA18:1	9	HanXRQChr09g0264571	Probable long-chain-alcohol oxidase FAO1
FA18:1	9	HanXRQChr09g0264581	Uncharacterized protein, supported by expression data
FA18:1	9	HanXRQChr09g0264591	Putative ribosomal protein/NADH dehydrogenase domain; Thioredoxin-like fold
FA!8:2	3	HanXRQChr03g0070311	Putative uncharacterised protein family, basic secretory protein
FA!8:2	3	HanXRQChr03g0070321	Putative uncharacterised protein family, basic secretory protein
FA!8:2	3	HanXRQChr03g0070331	Probable plant basic secretory protein (BSP) family protein
FA!8:2	3	HanXRQChr03g0070351	Putative phosphoribosyltransferase-like
FA!8:2	3	HanXRQChr03g0070361	Uncharacterized protein, supported by expression data
FA!8:2	3	HanXRQChr03g0070371	Uncharacterized protein, supported by expression data
FA!8:2	3	HanXRQChr03g0070381	Uncharacterized protein, supported by expression data
FA!8:2	5	HanXRQChr05g0135651	Putative ATPase, AAA-type, core; Peptidase, FtsH; Peptidase M41, FtsH extracellular; P-loop containing nucleoside triphosphate hydrolase
FA!8:2	5	HanXRQChr05g0135661	Putative small GTPase superfamily; P-loop containing nucleoside triphosphate hydrolase
FA!8:2	5	HanXRQChr05g0135671	Putative sugar phosphate transporter domain
FA!8:2	12	HanXRQChr12g0368171	Uncharacterized protein
FA!8:2	12	HanXRQChr12g0368181	Uncharacterized protein
FA18:2	14	HannXRQChr14g0435061	lncRNA
FA18:3	11	HanXRQChr11g0330521	Probable 60S ribosomal protein L6
FA18:3	11	HanXRQChr11g0330531	Putative thioredoxin-like fold
FA18:3	11	HanXRQChr11g0330541	Putative bifunctional inhibitor/plant lipid transfer protein/seed storage helical domain
FA19:0	2	HanXRQChr02g0059821	Probable transcription factor-related
FA19:0	2	HanXRQChr02g0059831	Probable histone deacetylase 8
FA19:0	2	HanXRQChr02g0059841	Putative seipin family
FA19:0	2	HanXRQChr02g0059851	Putative histone deacetylase complex subunit SAP30/SAP30-like
FA19:0	14	HanXRQChr14g0433231	Probable chitinase 5
FA19:0	14	HanXRQChr14g0433911	Putative tyrosine-protein kinase, neurotrophic receptor, type 3
FA19:0	14	HanXRQChr14g0433921	Putative mitogen-activated protein (MAP) kinase kinase kinase 10
FA19:0	14	HanXRQChr14g0433931	Putative protein kinase-like domain
FA19:0	14	HanXRQChr14g0433941	Putative ephrin receptor type-A /type-B
FA19:0	14	HanXRQChr14g0433951	Putative serine/threonine-protein kinase, active site; Ephrin receptor type-A /type-B
FA19:0	14	HanXRQChr14g0433961	Putative protein kinase-like domain
FA19:0	14	HanXRQChr14g0433971	Putative serine/threonine protein kinase, striated muscle-specific
FA19:0	14	HanXRQChr14g0433981	Uncharacterized protein, supported by expression data
FA19:0	14	HanXRQChr14g0433991	Putative serine/threonine-protein kinase, active site; Tyrosine-protein kinase, insulin-like receptor
FA19:0	14	HanXRQChr14g0434001	Putative tyrosine-protein kinase, Fes/Fps type
FA19:0	14	HanXRQChr14g0434011	Putative tyrosine-protein kinase, neurotrophic receptor, type 3
FA19:0	14	HanXRQChr14g0434021	Putative serine-threonine/tyrosine-protein kinase catalytic domain; Protein kinase-like domain
FA19:0	14	HanXRQChr14g0434031	Putative mitogen-activated protein (MAP) kinase kinase kinase, MLK1/MLK2/MLK4
FA19:0	14	HanXRQChr14g0434041	Uncharacterized protein, partly supported by expression data
FA19:0	14	HanXRQChr14g0434051	Putative tyrosine-protein kinase, neurotrophic receptor, type 3
FA19:0	14	HanXRQChr14g0434061	Putative ephrin receptor type-A /type-B
FA19:0	14	HanXRQChr14g0434081	Uncharacterized protein
FA19:0	14	HanXRQChr14g0434111	Putative serine/threonine-protein kinase Plk3
FA19:0	14	HanXRQChr14g0434121	Putative tyrosine-protein kinase, non-receptor Jak/Tyk2
FA19:0	14	HanXRQChr14g0434131	Putative mitogen-activated protein (MAP) kinase kinase kinase 7; Rho-associated protein kinase 1/2
FA19:0	14	HanXRQChr14g0434141	Putative mitogen-activated protein (MAP) kinase kinase kinase 10
FA19:0	14	HanXRQChr14g0434151	Putative tyrosine-protein kinase, neurotrophic receptor
FA19:0	14	HanXRQChr14g0434161	Putative protein kinase-like domain
FA19:0	14	HanXRQChr14g0434171	Putative tyrosine-protein kinase, CSF-1/PDGF receptor family
FA19:0	14	HanXRQChr14g0434181	Putative tyrosine-protein kinase, non-receptor Jak2
FA19:0	14	HanXRQChr14g0434191	Putative mitogen-activated protein (MAP) kinase kinase kinase 10
FA19:0	14	HanXRQChr14g0434071	Putative concanavalin A-like lectin/glucanase domain; Mitogen-activated protein (MAP) kinase kinase kinase 10
FA19:0	14	HanXRQChr14g0434091	Putative protein kinase-like domain
FA19:0	14	HanXRQChr14g0434101	Putative serine/threonine/dual specificity protein kinase, catalytic domain; Fibroblast growth factor receptor family
FA22:0	3	HanXRQChr03g0065591	putative F-box family protein
FA22:0	3	HannXRQChr03g0065601	lncRNA
FA22:0	3	HannXRQChr03g0066951	putative beta-hydroxyacyl-(acyl-carrier-protein) dehydratase FabZ, HotDog domain protein
FA22:0	3	HanXRQChr03g0066961	putative chlorophyll a-b binding protein CP24 10A protein
FA22:0	3	HannXRQChr03g0066971	lncRNA
FA22:0	3	HanXRQChr03g0066981	mRNA-putative galactose oxidase/kelch repeat superfamily protein
FA22:0	3	HannXRQChr03g0066991	putative transducin/WD40 repeat-like superfamily protein
FA22:0	3	HanXRQChr03g0067001	putative mRNA export factor
FA22:0	3	HannXRQChr03g0067011	putative protein kinase-like domain-containing protein
FA22:0	3	HannXRQChr03g0067201	putative CRAL-TRIO lipid binding domain-containing protein
FA22:0	3	HanXRQChr03g0067211	putative ethanolamine-phosphate cytidylyltransferase
FA22:0	3	HanXRQChr03g0067221	putative arginine decarboxylase
FA22:0	3	HannXRQChr03g0067231	lncRNA
FA22:0	3	HannXRQChr03g0067351	putative phospholipase A2, Phospholipase A2 domain protein
FA22:0	3	HannXRQChr03g0067591	lncRNA
FA22:0	3	HannXRQChr03g0067601	mRNA-putative plant self-incompatibility S1 and OTG30718.1
FA22:0	3	HannXRQChr03g0067661	putative eamA domain, WAT1-related protein
FA22:0	3	HannXRQChr03g0068281	putative peptidase S10, serine carboxypeptidase, Alpha/Beta hydrolase fold protein
FA22:0	3	HannXRQChr03g0068271	putative peptidase S10, serine carboxypeptidase, Alpha/Beta hydrolase fold protein
FA22:0	3	HannXRQChr03g0068291	lncRNA
FA22:0	3	HannXRQChr03g0068301	putative ARID DNA-binding domain, Zinc finger, CCHC-type, MEKHLA
FA22:0	3	HannXRQChr03g0068901	putative ccc1 family
FA22:0	7	HanXRQChr07g0188431	Putative DNA-binding domain
FA22:0	7	HanXRQChr07g0188441	Uncharacterized protein, supported by expression data
FA22:0	7	HanXRQChr07g0188451	Putative BRCT domain; FCP1 homology domain; Armadillo-type fold; HAD-like domain
FA22:0	7	HanXRQChr07g0188461	Putative DNA-binding domain
FA22:0	14	HanXRQChr14g043979	putative phosphoglucomutase protein
FA22:0	14	HannXRQChr14g0439801	putative sas10/U3 ribonucleoprotein (Utp) family protein
FA22:0	14	HannXRQChr14g0439821	putative ribosomal protein L1p/L10e family
FA22:0	14	HanXRQChr14g0439811	putative CTC-interacting domain 12
FA22:0	14	HannXRQChr14g0439831	putative helicase, P-loop containing nucleoside triphosphate hydrolase
FA22:0	14	HanXRQChr14g0439851	putative membrane-bound transcription factor site-2 protease
FA22:0	14	HanXRQChr14g0439851	putative import inner membrane translocase subunit Tim17/Tim22/Tim23 family protein
FA22:0	14	HanXRQChr14g0439841	putative related to ubiquitin 1
FA22:0	14	HanXRQChr14g0438921	Probable phosphatidic acid phosphatase (PAP2) family protein
FA22:0	14	HanXRQChr14g0438931	Putative homeodomain-like; MYB-CC type transcription factor, LHEQLE-containing domain
FA22:0	14	HanXRQChr14g0438941	Uncharacterized protein, supported by expression data
FA22:0	14	HanXRQChr14g0438951	Putative MYB-CC type transcription factor, LHEQLE-containing domain
FA22:0	14	HanXRQChr14g0438961	Uncharacterized protein
FA22:0	14	HanXRQChr14g0438971	Putative CCR4-Not complex component, Not N-terminal domain
FA22:0	14	HanXRQChr14g0438981	Putative ribosomal protein L2
FA22:0	14	HanXRQChr14g0438991	Putative protein kinase-like domain
FA22:0	14	HanXRQChr14g0439001	Putative mitogen-activated protein (MAP) kinase kinase kinase Ste11, Cryptococcus
FA22:0	14	HanXRQChr14g0439011	Putative zinc finger, RING/FYVE/PHD-type
FA22:0	14	HanXRQChr14g0439751	Probable VACUOLAR SORTING RECEPTOR 7
FA22:0	14	HanXRQChr14g0439761	Uncharacterized protein, supported by expression data
FA22:0	14	HanXRQChr14g0439781	Putative membrane bound O-acyl transferase, MBOAT
FA22:0	16	HanXRQChr16g0530601	Uncharacterized protein, supported by expression data
FA22:0	16	HanXRQChr16g0530611	Probable tubby-like F-box protein 5
FA24:0	2	HanXRQChr02g0040501	Uncharacterized protein, partly supported by expression data
FA24:0	2	HanXRQChr02g0040511	Probable protein kinase superfamily protein
FA24:0	2	HanXRQChr02g0041891	Probable myb domain protein 69
FA24:1	3	HanXRQChr03g0067361	Probable cation transporter HKT2
FA24:1	3	HanXRQChr03g0067371	Uncharacterized protein, partly conserved in plant genome(s)
FA24:1	3	HanXRQChr03g0068901	Putative ccc1 family
18:1/18:2ratio	3	HanXRQChr03g0070181	Probable PTEN 2
18:1/18:2ratio	3	HanXRQChr03g0070191	Putative C2 domain
18:1/18:2ratio	3	HanXRQChr03g0070201	Putative C2 domain
18:1/18:2ratio	3	HanXRQChr03g0070211	Putative C2 domain
18:1/18:2ratio	3	HanXRQChr03g0070221	Putative C2 domain
18:1/18:2ratio	3	HanXRQChr03g0070231	Putative DNA-directed RNA polymerase, alpha subunit
18:1/18:2ratio	3	HanXRQChr03g0070241	Putative leucine-rich repeat domain, L domain-like
18:1/18:2ratio	3	HanXRQChr03g0070251	Uncharacterized protein, supported by expression data
18:1/18:2ratio	3	HannXRQChr03g0070281	putative chlorophyll a/b binding protein domain-containing protein
