# Supplementary material for: Genotyping and lipid profiling of 601 cultivated sunflower lines reveals novel genetic determinants of oil fatty acid content
Source: BMC Genomics. 2021 Jul 5;22:505. doi: 10.1186/s12864-021-07768-y (PMC8256595; doi:10.1186/s12864-021-07768-y)
Supplement: Supplementary file 21 — Additional file 21: TableS8. SNP validation using MALDI-TOF. Table provides genotypes determined using MALDI-TOF for selected SNPs in sunset of lines. [file 12864_2021_7768_MOESM21_ESM.xlsx]

## Sheet: Лист1
Position	s1	s4	s102	s6	s103	s11	s525	s19	s530	s532	s533	s21	s22	s23	s116	s117	s31	s32	s550	s551	s122	s452	s552	s553	s457	s458	s126	s38	s128	s39	s557	s459	s40	s41	s559	s129	s44	s130	s47	s49	s131	s50	s464	s465	s132	s466	s51	s467	s133
S02_179620148	T	T	T	T	T	T	T	T	T	T	T	T	T	T	T	T	T	G	T	T	T	T	T	NA	T	G	G	T	T	G	T	T	T	T	T	G	T	T	T	T	T	T	T	G	T	T	T	T	T
S02_179872169	T	T	NA	NA	T	T	T	T	T	T	T	T	T	T	T	T	T	NA	T	T	T	T	T	NA	T	T	GT	T	T	T	T	T	T	T	T	NA	T	T	T	T	T	T	T	T	T	T	T	T	T
S03_35155696	T	T	T	T	T	T	T	T	T	T	C	T	T	T	T	T	T	T	T	T	T	T	T	T	T	T	T	C	T	T	T	T	T	T	T	T	T	T	T	T	T	T	C	T	T	T	T	T	T
S03_44696807	C	C	C	C	C	C	C	C	C	C	C	C	C	C	C	C	C	C	C	C	C	C	C	C	C	C	C	C	C	C	C	C	C	C	C	C	C	C	C	C	C	C	C	C	C	C	C	C	C
S10_178263586	A	A	A	A	A	A	A	A	A	A	A	A	A	A	A	A	A	AG	A	A	A	A	A	A	A	A	AG	A	A	AG	A	A	A	A	A	NA	A	A	A	A	A	A	A	AG	A	A	A	A	A
S13_124733371	C	C	C	C	C	C	C	C	C	NA	C	C	C	C	C	C	C	C	C	C	C	C	C	C	C	C	C	C	C	C	C	C	C	C	C	C	C	C	C	C	C	C	C	C	C	C	C	C	C
S14_53423548	T	T	T	T	T	T	T	T	T	T	T	T	T	T	T	T	T	C	T	T	T	T	T	T	T	C	C	T	T	C	T	T	T	T	T	C	T	T	T	T	T	T	T	C	T	T	T	T	T
S14_53480813	G	G	G	G	G	NA	G	G	G	G	G	G	G	G	G	G	G	T	G	G	G	G	G	G	G	G	T	G	G	T	G	G	G	G	G	T	G	G	G	G	G	G	G	T	G	G	G	G	G
S14_56559549	G	G	G	G	G	NA	G	G	G	G	G	G	G	G	G	G	G	G	G	G	G	G	G	G	G	G	G	G	G	G	G	G	G	G	G	G	G	G	G	G	G	G	G	G	G	G	G	G	G
S14_60721757	C	C	C	C	C	C	C	C	C	C	C	C	C	C	C	C	C	NA	C	C	C	C	C	C	C	C	CT	C	C	C	C	C	C	C	C	C	C	C	C	C	C	C	C	NA	C	C	C	C	C
S14_61085378	G	G	G	G	G	NA	G	G	G	G	G	G	G	G	G	G	G	T	G	G	G	G	G	G	G	G	T	G	G	T	G	G	G	G	G	T	G	G	G	G	G	G	G	T	G	G	G	G	G
[truncated: 26 more columns]
